# Supplementary material
Source: HighWire-hosted journal article supplement (https://rmdopen.bmj.com/content/3/2/e000505)
Supplement: inline-supplementary-material-1 [file inline-supplementary-material-1.docx]

| **Supplementary Table** Associations between ultrasound-detected osteophytes at baseline and incident radiographic or clinical OA at follow-up across joint groups (“All joints” corresponds to Table 2). | | | | | |
| --- | --- | --- | --- | --- | --- |
| **Dependent variables** | **Incidence (percentage)** | |  | **Odds ratio (95% CI)** | |
| **Joints with ultrasound-detected OP at BL** | **Joints with no ultrasound-detected OP at BL (ref.)** |  | **Crude** | **Adjusted*** |
| **a) Joints without radiographic OA (KLG=0) at BL (n=301)** | | | | | |
| Incident radiographic OA (KLG≥1) at FU | | | | | |
| All joints | 40/86 (46.5) | 37/215 (17.2) |  | 2.9 (1.6–5.4) | 4.1 (2.0–8.1) |
| DIP 2-5 | 14/25 (56.0) | 4/22 (18.2) |  | 5.2 (1.4–18.4) | 8.1 (2.2–29.9) |
| PIP 2-5 | 21/40 (52.5) | 28/144 (19.4) |  | 3.2 (1.3–7.4) | 3.9 (1.4–10.8) |
| IP 1 | 3/18 (16.7) | 2/30 (6.7) |  | 2.8 (0.4–20.7) | n/a |
| CMC 1 | 2/3 (66.7) | 3/19 (15.8) |  | 10.5 (0.7–150.4) | 21.4 (1.2–385.6) |
| Incident radiographic JSN ≥1 at FU | | | | | |
| All joints | 15/86 (17.4) | 9/215 (4.2) |  | 4.2 (1.8–10.2) | 5.3 (2.1–13.4) |
| DIP 2-5 | 7/25 (28.0) | 2/22 (9.1) |  | 3.8 (0.8–18.0) | 5.2 (1.0–26.1) |
| PIP 2-5 | 7/40 (17.5) | 4/144 (2.8) |  | 6.5 (1.7–25.5) | 6.4 (1.3–31.6) |
| IP 1 | 0/18 (0.0) | 1/30 (3.3) |  | n/a | n/a |
| CMC 1 | 1/3 (33.3) | 2/19 (10.5) |  | 3.6 (0.2–56.2) | n/a |
| Incident radiographic OP ≥1 at FU | | | | | |
| All joints | 31/86 (36.0) | 28/215 (13.0) |  | 2.9 (1.6–5.4) | 4.2 (2.1–8.5) |
| DIP 2-5 | 10/25 (40.0) | 2/22 (9.1) |  | 5.7 (1.4–22.8) | 12.5 (1.6–95.5) |
| PIP 2-5 | 17/40 (42.5) | 24/144 (16.7) |  | 3.1 (1.4–7.1) | 4.0 (1.5–10.5) |
| IP 1 | 3/18 (16.7) | 1/30 (3.3) |  | 5.8 (0.5–67.2) | n/a |
| CMC 1 | 1/3 (33.3) | 1/19 (5.3) |  | 8.5 (0.4–200.2) | n/a |
| **b) Joints without clinical OA (no bony enlargement) at BL (n=718)** | | | | | |
| Incident bony enlargement at FU | | | | | |
| All joints | 237/392 (60.5) | 86/325 (26.5) |  | 3.4 (2.4–4.8) | 3.5 (2.4–5.1) |
| DIP 2-5 | 94/135 (69.6) | 21/57 (36.8) |  | 3.1 (1.6–5.8) | 3.0 (1.6–5.8) |
| PIP 2-5 | 88/147 (59.9) | 51/203 (25.1) |  | 2.4 (1.6–3.7) | 2.6 (1.6–4.1) |
| IP 1 | 34/60 (56.7) | 9/35 (25.7) |  | 3.4 (1.5–7.8) | 5.7 (2.0–16.8) |
| CMC 1 | 21/50 (42.0) | 5/30 (16.7) |  | 3.4 (1.1–10.4) | 3.3 (1.0–11.2) |
| Generalized Estimating Equations presented as odds ratios for development of OA features at follow-up with separate models for each feature. BL, baseline; CI, confidence interval; FU, follow-up; JSN, joint space narrowing; KLG, Kellgren-Lawrence grade; n/a, not applicable (due to inappropriate models for the data and/or likelihood ratio approaching zero); OA, osteoarthritis; OP, osteophytes; ref, reference in regression analyses. *Adjusted for age, sex, body mass index, and follow-up time. | | | | | |
